# Supplementary material for: Biological Control of Fruit Rot and Anthracnose of Postharvest Mango by Antagonistic Yeasts from Economic Crops Leaves
Source: PubMed Central journal article supplement (PMC7143844; doi:10.3390/microorganisms8030317), 2020-02-25
Supplement: microorganisms-08-00317-s001.pdf [file microorganisms-08-00317-s001.pdf]

**Table S1** Yeast species and strains belonging to phylum Ascomycota and phylum Basidiomycota

| <b>Taxa</b>                                          | <b>Strain</b>                                                                                                                                                                                                                                                  | <b>No. of strain</b> |
|------------------------------------------------------|----------------------------------------------------------------------------------------------------------------------------------------------------------------------------------------------------------------------------------------------------------------|----------------------|
| <b>Phylum Ascomycota, Subphylum Saccharomycotina</b> |                                                                                                                                                                                                                                                                |                      |
| <i>Candida citri</i>                                 | DMKU-RE05                                                                                                                                                                                                                                                      | 1                    |
| <i>Candida diddensiae</i>                            | DMKU-RP155                                                                                                                                                                                                                                                     | 1                    |
| <i>Candida fermentati</i>                            | DMKU-CP79                                                                                                                                                                                                                                                      | 1                    |
| <i>Candida floricola</i>                             | DMKU-CP149                                                                                                                                                                                                                                                     | 1                    |
| <i>Candida fukuyamaensis</i>                         | DMKU-CP312                                                                                                                                                                                                                                                     | 1                    |
| <i>Candida intermedia</i>                            | YE-20                                                                                                                                                                                                                                                          | 1                    |
| <i>Candida maltose</i>                               | DMKU-RP16                                                                                                                                                                                                                                                      | 1                    |
| <i>Candida metapsilosis</i>                          | DMKU-RE07, DMKU-RE15, DMKU-RE18,<br>DMKU-RE35                                                                                                                                                                                                                  | 4                    |
| <i>Candida michaelii</i>                             | YE239                                                                                                                                                                                                                                                          | 1                    |
| <i>Candida nivariensis</i>                           | DMKU-CE15, DMKU-CE18                                                                                                                                                                                                                                           | 2                    |
| <i>Candida parapsilosis</i>                          | DMKU-RP300, DMKU-SP64, DMKU-SP434                                                                                                                                                                                                                              | 3                    |
| <i>Candida pseudointermedia</i>                      | DMKU-CE37, DMKU-CE59, DMKU-CE87,<br>DMKU-CE142                                                                                                                                                                                                                 | 4                    |
| <i>Candida saopaulonensis</i>                        | DMKU-CP708                                                                                                                                                                                                                                                     | 1                    |
| <i>Candida sp.</i>                                   | DMKU-CE01                                                                                                                                                                                                                                                      | 1                    |
| <i>Candida tropicalis</i>                            | DMKU-RE48, DMKU-RE68, DMKU-RP14,<br>DMKU-CE04, DMKU-SE-73, DMKU-SE80,<br>DMKU-SE98                                                                                                                                                                             | 7                    |
| <i>Candida uthaithanina</i>                          | DMKU-CP825                                                                                                                                                                                                                                                     | 1                    |
| <i>Candida wangnamhkiaoensi</i>                      | YE-166                                                                                                                                                                                                                                                         | 1                    |
| <i>Cyberlindnera minuta</i>                          | DMKU-CP557, DMKU-SE74                                                                                                                                                                                                                                          | 2                    |
| <i>Cyberlindnera rhodanensis</i>                     | DMKU-RE125, DMKU-SE04, DMKU-SE22,<br>DMKU-SE29, DMKU-SE84                                                                                                                                                                                                      | 5                    |
| <i>Debaryomyces nepalensis</i>                       | DMKU-RP03                                                                                                                                                                                                                                                      | 1                    |
| <i>Hyphopichia burtonii</i>                          | YE-164                                                                                                                                                                                                                                                         | 1                    |
| <i>Kluyveromyces marianus</i>                        | DMKU-CE134                                                                                                                                                                                                                                                     | 1                    |
| <i>Kodamaea ohmeri</i>                               | DMKU-RE27, DMKU-RP06, DMKU-RP34,<br>DMKU-RP233, DMKU-CP51, DMKU-CP471,<br>DMKU-CP258, DMKU-SP45                                                                                                                                                                | 8                    |
| <i>Kodamaea sp.</i>                                  | DMKU-SP81                                                                                                                                                                                                                                                      | 1                    |
| <i>Metschnikowia lophuriensis</i>                    | DMKU-CP680                                                                                                                                                                                                                                                     | 1                    |
| <i>Meyerozyma caribbica</i>                          | DMKU-RE37, DMKU-RE75, DMKU-RE87,<br>DMKU-RE95, DMKU-RE102, DMKU-RP07,<br>DMKU-RP47, DMKU-CE27, DMKU-CE32,<br>DMKU-CE33, DMKU-CE35, DMKU-CE38,<br>DMKU-CE51, DMKU-CE56, DMKU-CE77,<br>DMKU-CE83, DMKU-CE119, DMKU-CE123,<br>DMKU-CE140, DMKU-CE629, DMKU-CE783, | 46                   |

| Taxa                                                   | Strain                                                                                                                                                                                                                                                                                   | No. of strain |
|--------------------------------------------------------|------------------------------------------------------------------------------------------------------------------------------------------------------------------------------------------------------------------------------------------------------------------------------------------|---------------|
|                                                        | DMKU-CE503, DMKU-CE666, DMKU-CE813, DMKU-SE01, DMKU-SE10, DMKU-SE12, DMKU-SE12, DMKU-SE13, DMKU-SE28, DMKU-SE42, DMKU-SE46, DMKU-SE65, DMKU-SE76, DMKU-SE78, DMKU-SE86, DMKU-SE87, DMKU-SE93, DMKU-SE96, DMKU-SE97, DMKU-SE101, DMKU-SP01, DMKU-SP24, DMKU-SP121, DMKU-SP197, DMKU-SP461 |               |
| <i>Meyerozyma guilliermondii</i>                       | DMKU-RP26                                                                                                                                                                                                                                                                                | 1             |
| <i>Pichia aff. fermentans</i>                          | DMKU-CP733                                                                                                                                                                                                                                                                               | 1             |
| <i>Pichia kudriavzevii</i>                             | DMKU-CE48, DMKU-CP672, DMKU-SE109, DMKU-SE114, DMKU-SE117, DMKU-SE140, DMKU-SE144, DMKU-SE145                                                                                                                                                                                            | 8             |
| <i>Pichia myanmerensis</i>                             | DMKU-CP657                                                                                                                                                                                                                                                                               | 1             |
| <i>Torulaspora indica</i>                              | DMKU-RP31, DMKU-RP35                                                                                                                                                                                                                                                                     | 2             |
| <i>Wickerhamomyces anomalus</i>                        | DMKU-RE13, DMKU-RE38, DMKU-RE62, DMKU-RP04, DMKU-RP25, DMKU-CP122, DMKU-CP571, DMKU-CE52, DMKU-CE55, DMKU-SE112, DMKU-SE132, DMKU-SP335                                                                                                                                                  | 12            |
| <i>Yamadazyma epiphylla</i>                            | YE-170                                                                                                                                                                                                                                                                                   | 1             |
| <b>Phylum Basidiomycota, Subphylum Agaricomycotina</b> |                                                                                                                                                                                                                                                                                          |               |
| <i>Dioszegia zsoitii</i>                               | DMKU-SP116                                                                                                                                                                                                                                                                               | 1             |
| <i>Kwoniella haveanensis</i>                           | DMKU-CE102, DMKU-SP237                                                                                                                                                                                                                                                                   | 2             |
| <i>Hannella lutiola</i>                                | DMKU-CP282                                                                                                                                                                                                                                                                               | 1             |
| <i>Hannella oryzae</i>                                 | DMKU-CP174, YE-69, DMKU-CP775                                                                                                                                                                                                                                                            | 3             |
| <i>Hannella pagnoccae</i>                              | DMKU-CP636, DMKU-SP56                                                                                                                                                                                                                                                                    | 2             |
| <i>Hannella phyllophila</i>                            | DMKU-CP648, DMKU-CP673, DMKU-SP186                                                                                                                                                                                                                                                       | 3             |
| <i>Hannella sinensis</i>                               | DMKU-CP437, DMKU-CP606, DMKU-CP665, DMKU-CP712, DMKU-CP181, DMKU-CP321, DMKU-SE105, DMKU-SP222, YE-56, YE-58                                                                                                                                                                             | 10            |
| <i>Hannella siamensis</i>                              | DMKU-CP09, DMKU-CP631, YE-124                                                                                                                                                                                                                                                            | 3             |
| <i>Naganishia albidosimilis</i>                        | DMKU-CE74, DMKU-CE85                                                                                                                                                                                                                                                                     | 2             |
| <i>Naganishia liquefaciens</i>                         | DMKU-CE05                                                                                                                                                                                                                                                                                | 1             |
| <i>Papiliotrema aspenensis</i>                         | DMKU-CE31, DMKU-SP67, DMKU-SP423, YE-105                                                                                                                                                                                                                                                 | 4             |
| <i>Papiliotrema flavescens</i>                         | DMKU-CE11, DMKU-CE22, DMKU-CE129, DMKU-CE139, DMKU-CP654, DMKU-CP734, DMKU-SE92, DMKU-SP20, DMKU-SP231, YE-26, YE-127                                                                                                                                                                    | 11            |

| Taxa                                                    | Strain                                                                                                                                                                   | No. of strain |
|---------------------------------------------------------|--------------------------------------------------------------------------------------------------------------------------------------------------------------------------|---------------|
| <i>Papiliotrema japonica</i>                            | DMKU-RE36, DMKU-SE03, DMKU-SE69, YE-135                                                                                                                                  | 4             |
| <i>Papiliotrema laurentii</i>                           | DMKU-CE109, DMKU-CP560, DMKU-CP585, YE-23                                                                                                                                | 4             |
| <i>Papiliotrema nemorosus</i>                           | DMKU-RP276, DMKU-CP38, DMKU-CP391                                                                                                                                        | 3             |
| <i>Papiliotrema rajasthanensis</i>                      | DMKU-CP10, DMKU-CP603, DMKU-CP823, DMKU-SP89                                                                                                                             | 4             |
| <i>Papiliotrema ruineniae</i>                           | DMKU-CP781, DMKU-CP818                                                                                                                                                   | 2             |
| <i>Papiliotrema siamense</i>                            | DMKU-RP152, DMKU-SP199, DMKU-SE34                                                                                                                                        | 3             |
| <i>Papiliotrema</i> sp.                                 | DMKU-RE45, DMKU-RE85, DMKU-CE70, DMKU-CE95, DMKU-CP115, DMKU-SE32, DMKU-SE67, DMKU-SE107                                                                                 | 8             |
| <i>Piskurozyma taiwanensis</i>                          | DMKU-SP98                                                                                                                                                                | 1             |
| <i>Saitozyma flava</i>                                  | DMKU-RE19, DMKU-RE30, DMKU-CP150, DMKU-SE94, DMKU-SP117, DMKU-SP285                                                                                                      | 6             |
| <i>Saitozyma</i> sp.                                    | DMKU-SE48, DMKU-SE56                                                                                                                                                     | 2             |
| <i>Trichosporon asteroides</i>                          | YE-169                                                                                                                                                                   | 1             |
| <i>Vishniacozyma taibaiensis</i>                        | YE-155                                                                                                                                                                   | 1             |
| <b>Phylum Basidiomycota, Subphylum Pucciniomycotina</b> |                                                                                                                                                                          |               |
| <i>Cystobasidium</i> sp.                                | DMKU-RE72                                                                                                                                                                | 1             |
| <i>Occultifer plantarum</i>                             | DMKU-RP30                                                                                                                                                                | 1             |
| <i>Occultifer</i> sp.                                   | DMKU-SE45, DMKU-SE129                                                                                                                                                    | 2             |
| <i>Occultifer tropicalis</i>                            | DMKU-SE38, DMKU-SE59                                                                                                                                                     | 2             |
| <i>Rhodosporiobolus fluvialis</i>                       | DMKU-CP293                                                                                                                                                               | 1             |
| <i>Rhodosporiobolus ruineniae</i>                       | DMKU-CE136                                                                                                                                                               | 1             |
| <i>Rhodotorula mucilaginoso</i>                         | DMKU-RE113, DMKU-RP68, DMKU-CE05, DMKU-CE30, DMKU-CE91, DMKU-CE110, DMKU-CP165, DMKU-CP596, DMKU-SE81, DMKU-SE91, DMKU-SP02                                              | 11            |
| <i>Rhodotorula paludigena</i>                           | DMKU-RP198, DMKU-CE132, DMKU-CP170, DMKU-CP218, DMKU-CP625, DMKU-CP752, , DMKU-SP381, YE-25                                                                              | 8             |
| <i>Rhodotorula slooffiae</i>                            | DMKU-CP485                                                                                                                                                               | 1             |
| <i>Rhodotorula</i> sp.                                  | DMKU-RE31, DMKU-CE121, DMKU-CP209, DMKU-SE27                                                                                                                             | 4             |
| <i>Rhodotorula taiwanensis</i>                          | DMKU-RE57, DMKU-RE64, DMKU-RE96, DMKU-RE106, DMKU-RE115, DMKU-RP252, DMKU-CE03, DMKU-CE49, DMKU-CE53, DMKU-CE61, DMKU-CE78, DMKU-CE80, DMKU-CE88, DMKU-CE94, DMKU-CE106, | 20            |

| Taxa                                                      | Strain                                                                                  | No. of strain |
|-----------------------------------------------------------|-----------------------------------------------------------------------------------------|---------------|
|                                                           | DMKU-CE118, DMKU-CE126, DMKU-CP18,<br>DMKU-SP35, DMKU-SP63                              |               |
| <i>Rhodotorula toruloides</i>                             | DMKU-RP49, DMKU-CP570                                                                   | 2             |
| <i>Sakaguchia oryzae</i>                                  | DMKU-RP190                                                                              | 1             |
| <i>Sporidiobolus carnicolor</i>                           | DMKU-SP75, DMKU-SP181                                                                   | 2             |
| <i>Sporidiobolus pararoseus</i>                           | DMKU-RE112, DMKU-RP134, DMKU-CP183,<br>DMKU-CP195, DMKU-CP305, DMKU-CP799,<br>DMKU-SE11 | 7             |
| <i>Sporobolomyces blumeae</i>                             | DMKU-CP601, DMKU-CP613, DMKU-SP12,<br>DMKU-SP47, YE15                                   | 5             |
| <i>Sporobolomyces nakasei</i>                             | DMKU-CP741                                                                              | 1             |
| <i>Sporobolomyces carnicolor</i>                          | DMKU-RE14, DMKU-RE33, DMKU-RE44,<br>DMKU-RE47                                           | 4             |
| <i>Sporobolomyces</i> sp.                                 | DMKU-RE104                                                                              | 1             |
| <i>Symmetrospora marina</i>                               | DMKU-SP251, DMKU-SP281                                                                  | 2             |
| <i>Symmetrospora vermiculata</i>                          | DMKU-RP33, DMKU-SP261, DMKU-SP307                                                       | 3             |
| <b>Phylum Basidiomycota, Subphylum Ustilaginomycotina</b> |                                                                                         |               |
| <i>Dirkmeia churashimeansis</i>                           | DMKU-RP27, DMKU-CP612, DMKU-CP692,<br>DMKU-SP49, DMKU-SP97                              | 5             |
| <i>Jaminaea angkorensis</i>                               | DMKU-SP36, DMKU-SP416                                                                   | 2             |
| <i>Moesziomyces aphidis</i>                               | DMKU-CP111, DMKU-CP220, DMKU-SP38,<br>DMKU-SP95                                         | 4             |
| <i>Moesziomyces parantarcticus</i>                        | DMKU-RP39                                                                               | 1             |
| <i>Pseudozyma hubeiensis</i>                              | DMKU-SP13, YE-21                                                                        | 2             |
| <i>Ustilago siamensis</i>                                 | DMKU-SE62, YE-86                                                                        | 2             |

#

**Table S2#** Antagonistic activities of antagonistic yeast strains against *L. theobromae* and *C. gloeosporioides* by dual cultivation on PDA plates and activities of VOCs produced by these strains by double plate technique at 25°C for 3 and 14 days, respectively

| Treatment                                                  | Fungal pathogens growth inhibition (%) <sup>a</sup> |                  |
|------------------------------------------------------------|-----------------------------------------------------|------------------|
|                                                            | Antagonistic activity                               | Activity of VOCs |
| <i>T. indica</i> DMKU-RP31 + <i>L. theobromae</i>          | 67.7±0.89a                                          | 51.3±7.54a       |
| <i>T. indica</i> DMKU-RP35 + <i>L. theobromae</i>          | 67.9±4.40a                                          | 59.8±4.66a       |
| <i>Ps. hubeiensis</i> YE-21 + <i>L. theobromae</i>         | 56.7±0.89b                                          | 34.4±4.34b       |
| <i>P. aspenensis</i> DMKU-SP67 + <i>C. gloeosporioides</i> | 66.3±3.74                                           | 55.6±2.86        |

In the same column data followed by the different, same, and overlapping lower-case letters means significantly different, and no significantly different of their overlapping to Duncan's multiple range test at  $p \leq 0.05$ . Each result presents the mean  $\pm$  standard derivation from three replicates

<sup>a</sup>Inhibition (%) = (radius of control fungal colony – radius of fungal colony grows with yeast)  $\times$  100/radius of control fungal colony
